# Supplementary material for: Comparative Genomic Hybridization Analysis ofYersinia enterocoliticaandYersinia pseudotuberculosisIdentifies Genetic Traits to Elucidate Their Different Ecologies
Source: Hindawi journal article supplement (doi:10.1155/2015/760494), 2015-01-01
Supplement: f1 [file 760494.f1.pdf]

674 Table S1 *Yersinia* strains hybridized on microarrays and their name, isolation source, bioserotype and  
675 origin.

| No | Species and group(s)                                        | Strain name         | Isolation source  | BT/ST  | Origin    |
|----|-------------------------------------------------------------|---------------------|-------------------|--------|-----------|
| 1  | <i>Y. enterocolitica</i> /Other biotypes & Reference strain | 8081/NCTC 13174     | Human             | 1B/O:8 | Ohio, USA |
| 2  | <i>Y. enterocolitica</i> /4/O:3 & Reference strain          | Y11/DSM no. 13030   | Human             | 4/O:3  | Germany   |
| 3  | <i>Y. pseudotuberculosis</i> & Reference strain             | IP 32953            | Human             | 1      | France*   |
| 4  | <i>Y. enterocolitica</i>                                    | Strain HV           | Unknown           | 1B     | Unknown   |
| 5  | <i>Y. enterocolitica</i> /4/O:3                             | 183 (YLUT 81.1)     | Swine, tonsils    | 4/O:3  | Finland   |
| 6  | <i>Y. enterocolitica</i> /4/O:3                             | 185 (YLUU 96.1 k)   | Swine, feces      | 4/O:3  | Finland   |
| 7  | <i>Y. enterocolitica</i> /4/O:3                             | 187 (YLUT 351.1)    | Swine, tonsils    | 4/O:3  | Finland   |
| 8  | <i>Y. enterocolitica</i> /4/O:3                             | 188 (YLUR 224.1 c)  | Swine, carcass    | 4/O:3  | Finland   |
| 9  | <i>Y. enterocolitica</i> /4/O:3                             | 191 (YLUR 96.1 k)   | Swine, carcass    | 4/O:3  | Finland   |
| 10 | <i>Y. enterocolitica</i> /4/O:3                             | 192 (YLUT 22.1 c)   | Swine, tonsils    | 4/O:3  | Finland   |
| 11 | <i>Y. enterocolitica</i> /4/O:3                             | 196 (YLUT 361.1 k)  | Swine, tonsils    | 4/O:3  | Finland   |
| 12 | <i>Y. enterocolitica</i> /4/O:3                             | 201 (YLUE 2 k)      | Swine, organs     | 4/O:3  | Finland   |
| 13 | <i>Y. enterocolitica</i> /4/O:3                             | 204 (YLUS 1.1 c)    | Swine, intestines | 4/O:3  | Finland   |
| 14 | <i>Y. enterocolitica</i> /4/O:3                             | 206 (3.1c L)        | Swine, tonsils    | 4/O:3  | England   |
| 15 | <i>Y. enterocolitica</i> /4/O:3                             | 208 (10.1c)         | Swine, tonsils    | 4/O:3  | England   |
| 16 | <i>Y. enterocolitica</i> /4/O:3                             | 210 (4.1i)          | Swine, tonsils    | 4/O:3  | England   |
| 17 | <i>Y. enterocolitica</i> /4/O:3                             | 213 (96.2c)         | Swine, tonsils    | 4/O:3  | England   |
| 18 | <i>Y. enterocolitica</i> /4/O:3                             | 214 (YLUU 346.1 I)  | Swine, feces      | 4/O:3  | Finland   |
| 19 | <i>Y. enterocolitica</i> /4/O:3                             | 219 (144c.2)        | Swine, tonsils    | 4/O:3  | England   |
| 20 | <i>Y. enterocolitica</i> /4/O:3                             | 228 (207c.1)        | Swine, tonsils    | 4/O:3  | England   |
| 21 | <i>Y. enterocolitica</i> /4/O:3                             | 231 (RUS 6.17.3 i)  | Swine, tonsils    | 4/O:3  | Russia    |
| 22 | <i>Y. enterocolitica</i> /4/O:3                             | 232 (RUS 7.7.1 i)   | Swine, tonsils    | 4/O:3  | Russia    |
| 23 | <i>Y. enterocolitica</i> /4/O:3                             | 233 (RUS 6.11.3 i)  | Swine, tonsils    | 4/O:3  | Russia    |
| 24 | <i>Y. enterocolitica</i> /4/O:3                             | 234 (RUS 6.15.2 i)  | Swine, tonsils    | 4/O:3  | Russia    |
| 25 | <i>Y. enterocolitica</i> /4/O:3                             | 236 (RUS 2.10.1 i)  | Swine, tonsils    | 4/O:3  | Russia    |
| 26 | <i>Y. enterocolitica</i> /4/O:3                             | 238 (RUS 5.1.1 i)   | Swine, tonsils    | 4/O:3  | Russia    |
| 27 | <i>Y. enterocolitica</i> /4/O:3                             | 239 (RUS 5.10.1. i) | Swine, tonsils    | 4/O:3  | Russia    |
| 28 | <i>Y. enterocolitica</i> /4/O:3                             | 240 (RUS 9.15.1 k)  | Swine, tonsils    | 4/O:3  | Russia    |
| 29 | <i>Y. enterocolitica</i> /4/O:3                             | 241 (RUS 9.18.1 k)  | Swine, tonsils    | 4/O:3  | Russia    |
| 30 | <i>Y. enterocolitica</i> /4/O:3                             | 244 (7.2 i (7.1))   | Swine, tonsils    | 4/O:3  | England   |
| 31 | <i>Y. enterocolitica</i> /4/O:3                             | 249 (205k.3)        | Swine, tonsils    | 4/O:3  | England   |
| 32 | <i>Y. enterocolitica</i> /4/O:3                             | 260 (YLUT 99.1 K)   | Swine, tonsils    | 4/O:3  | Finland   |
| 33 | <i>Y. enterocolitica</i> /4/O:3                             | 265 (YLUT 106.1K)   | Swine, tonsils    | 4/O:3  | Finland   |
| 34 | <i>Y. enterocolitica</i> /4/O:3                             | 266 (YLUT 107.1 K)  | Swine, tonsils    | 4/O:3  | Finland   |
| 35 | <i>Y. enterocolitica</i> /4/O:3                             | 270 (YLUT 124.4 K)  | Swine, tonsils    | 4/O:3  | Finland   |
| 36 | <i>Y. enterocolitica</i> /4/O:3                             | 272 (YLUT 129.1 K)  | Swine, tonsils    | 4/O:3  | Finland   |
| 37 | <i>Y. enterocolitica</i> /4/O:3                             | 273 (YLUT 143.2 C)  | Swine, tonsils    | 4/O:3  | Finland   |
| 38 | <i>Y. enterocolitica</i> /4/O:3                             | 278 (YLUT 168.1 K)  | Swine, tonsils    | 4/O:3  | Finland   |
| 39 | <i>Y. enterocolitica</i> /4/O:3                             | 284 (IHI 110193)    | Human             | 4/O:3  | Finland   |

Table S1 continues

| No | Species and group(s)                     | Strain name       | Isolation source              | BT/ST    | Origin  |
|----|------------------------------------------|-------------------|-------------------------------|----------|---------|
| 40 | <i>Y. enterocolitica</i> /4/O:3          | 290 (IHI 111204)  | Human                         | 4/O:3    | Åland   |
| 41 | <i>Y. enterocolitica</i> /4/O:3          | 302 (IHI 111042)  | Human                         | 4/O:3    | Finland |
| 42 | <i>Y. enterocolitica</i> /4/O:3          | 303 (IHI 111040)  | Human                         | 4/O:3    | Finland |
| 43 | <i>Y. enterocolitica</i> /4/O:3          | 229 (E3c.1k)      | Swine, tonsils                | BT 4     | Estonia |
| 44 | <i>Y. enterocolitica</i> /4/O:3          | 230 (E6d.1c)      | Swine, tonsils                | BT 4     | Estonia |
| 45 | <i>Y. enterocolitica</i> /4/O:3          | 250 (E7d.2c)      | Swine, tonsils                | BT 4     | Estonia |
| 46 | <i>Y. enterocolitica</i> /Other biotypes | 218 (120.3k)      | Swine, tonsils                | 3/O:5,27 | England |
| 47 | <i>Y. enterocolitica</i> /Other biotypes | 220 (126c.1)      | Swine, tonsils                | 2/O:5,27 | England |
| 48 | <i>Y. enterocolitica</i> /Other biotypes | 221 (257.2i)      | Swine, tonsils                | 2/O:9    | England |
| 49 | <i>Y. enterocolitica</i> /Other biotypes | 223 (133.1i)      | Swine, tonsils                | 3/O:5,27 | England |
| 50 | <i>Y. enterocolitica</i> /Other biotypes | 224 (134.1i)      | Swine, tonsils                | 3/O:5,27 | England |
| 51 | <i>Y. enterocolitica</i> /Other biotypes | 225 (291.1k)      | Swine, tonsils                | 3/O:5,27 | England |
| 52 | <i>Y. enterocolitica</i> /Other biotypes | 254 (288.1i)      | Swine, tonsils                | O:9      | England |
| 53 | <i>Y. enterocolitica</i> /Other biotypes | 255 (290i)        | Swine, tonsils                | O:9      | England |
| 54 | <i>Y. enterocolitica</i> /Other biotypes | 257 (294.1i)      | Swine, tonsils                | O:9      | England |
| 55 | <i>Y. enterocolitica</i> /Other biotypes | 291 (LIP52 1ITC1) | Bird, droppings               | 1A       | Finland |
| 56 | <i>Y. enterocolitica</i> /Other biotypes | 292 (LIP52 3)     | Bird, droppings               | 1A       | Finland |
| 57 | <i>Y. enterocolitica</i> /Other biotypes | 293 (LIP77)       | Bird, droppings               | 1A       | Finland |
| 58 | <i>Y. enterocolitica</i> /Other biotypes | 296 (JUY2A 1ITC1) | Swine, carcass                | 1A       | Finland |
| 59 | <i>Y. enterocolitica</i> /Other biotypes | 297 (JUY1A ITC1)  | Swine, carcass                | 1A       | Finland |
| 60 | <i>Y. enterocolitica</i> /Other biotypes | 299 (JUY4D 1ITC1) | Swine, internal organs        | 1A       | Finland |
| 61 | <i>Y. enterocolitica</i> /Other biotypes | 300 (JUYE)        | Slaughterhouse surface sample | 1A       | Finland |
| 62 | <i>Y. enterocolitica</i> /Other biotypes | YE-ys23-m2kc      | Swine, carcass                | 1B/O:8   | Finland |
| 63 | <i>Y. pseudotuberculosis</i>             | YTSKO 21.1 P1     | Swine, tonsils                | 2/NA     | Unknown |
| 64 | <i>Y. pseudotuberculosis</i>             | YTSKO 21.2 K2     | Swine, tonsils                | 2/NA     | Unknown |
| 65 | <i>Y. pekkanenii</i>                     | ÅYV 7.1 K2        | Water                         | 2        | Åland** |
| 66 | <i>Y. pseudotuberculosis</i>             | LIP 65.1          | Pigeon                        | 1/O:1    | Finland |
| 67 | <i>Y. pseudotuberculosis</i>             | IHI 110 950       | Human                         | 1/NA     | Finland |
| 68 | <i>Y. pseudotuberculosis</i>             | LE 116.2          | Cat                           | 2/NA     | Unknown |
| 69 | <i>Y. pseudotuberculosis</i>             | 470_96 Oulu       | Hare                          | ET       | Finland |
| 70 | <i>Y. pseudotuberculosis</i>             | YSI 45 KS         | Swine, feces                  | 2/O:3    | Finland |
| 71 | <i>Y. pseudotuberculosis</i>             | YSI 85.2 K        | Swine, feces                  | 2/O:3    | Finland |
| 72 | <i>Y. pseudotuberculosis</i>             | YSI 116.1 R1      | Swine, feces                  | 2/NA     | Finland |
| 73 | <i>Y. pseudotuberculosis</i>             | YSI 120.8 S       | Swine, feces                  | 2/NA     | Finland |
| 74 | <i>Y. pseudotuberculosis</i>             | YSI 217 K         | Slaughterhouse surface sample | 2/O:3    | Finland |
| 75 | <i>Y. pseudotuberculosis</i>             | YSI 230 KS        | Swine, feces                  | 2/NA     | Finland |
| 76 | <i>Y. pseudotuberculosis</i>             | HUM B 255         | Human                         | 1/NA     | Finland |
| 77 | <i>Y. pseudotuberculosis</i>             | YLUS 71.4 C       | Swine                         | 2        | Finland |
| 78 | <i>Y. pseudotuberculosis</i>             | YLUU 77.21 K      | Swine, tonsils                | NA       | Finland |
| 79 | <i>Y. pseudotuberculosis</i>             | GNS 24_2 91       | Magpie                        | 1/O:1    | Sweden  |
| 80 | <i>Y. pseudotuberculosis</i>             | GNS 28_2 98       | Pigeon                        | NA/O:1   | Sweden  |

Table S1 continues

| No | Species and group            | Strain name    | Isolation source | BT/ST | Origin  |
|----|------------------------------|----------------|------------------|-------|---------|
| 81 | <i>Y. pseudotuberculosis</i> | YEB 112        | Swine            | NA    | England |
| 82 | <i>Y. pseudotuberculosis</i> | YEB 118        | Swine            | NA    | England |
| 83 | <i>Y. pseudotuberculosis</i> | YEB 180        | Swine            | NA    | England |
| 84 | <i>Y. pseudotuberculosis</i> | YEB 192        | Swine            | NA    | England |
| 85 | <i>Y. pseudotuberculosis</i> | YEB 193        | Swine            | NA    | England |
| 86 | <i>Y. pseudotuberculosis</i> | 312k.1A        | Swine            | NA    | England |
| 87 | <i>Y. pseudotuberculosis</i> | 311.1c         | Swine            | NA    | England |
| 88 | <i>Y. pseudotuberculosis</i> | 312.1c         | Swine            | NA    | England |
| 89 | <i>Y. pseudotuberculosis</i> | 303k.2         | Swine            | NA    | England |
| 90 | <i>Y. pseudotuberculosis</i> | 21.2c          | Swine            | NA    | England |
| 91 | <i>Y. pseudotuberculosis</i> | H5N7.12.1k     | Swine            | 1     | Belgium |
| 92 | <i>Y. pseudotuberculosis</i> | YLUS 71.3 C    | Swine            | 3     | Finland |
| 93 | <i>Y. pseudotuberculosis</i> | YLUS 71.6 C    | Swine            | 3     | Finland |
| 94 | <i>Y. pseudotuberculosis</i> | YLUU 51.1 C    | Swine            | 3     | Finland |
| 95 | <i>Y. pseudotuberculosis</i> | RUS 6.3.2k     | Swine            | 2     | Russia  |
| 96 | <i>Y. pseudotuberculosis</i> | RUS 3.11.1k.2d | Swine            | 2     | Russia  |
| 97 | <i>Y. pseudotuberculosis</i> | 732_98         | Magpie           | 1/O:1 | Finland |
| 98 | <i>Y. pseudotuberculosis</i> | YEB 42A        | Swine            | NA    | England |
| 99 | <i>Y. pseudotuberculosis</i> | YSI 45.2 K     | Swine, feces     | 2     | Finland |

\* Presented by Elizabeth Carniel, Institut Pasteur \*\* Not included in the results, BT = biotype, ST = serotype,  
NA = Not Available

679 Table S2 Chromosome and plasmid sequences used in microarray design.

| Genebank access         | Strain and/or plasmid name                                                               | Reference article      | CDS    |
|-------------------------|------------------------------------------------------------------------------------------|------------------------|--------|
| AM286415.1 <sup>a</sup> | <i>Yersinia enterocolitica</i> subsp. <i>enterocolitica</i> 8081, NCTC 13174             | [62]                   | 3979   |
| AM286416.1              | pYVe8081                                                                                 |                        | 72     |
| FR729477.2 <sup>a</sup> | <i>Yersinia enterocolitica</i> subsp. <i>paleartica</i> Y11, also known as DSM no. 13030 | [65]                   | 4349   |
| FR745874.1              | pYV                                                                                      |                        | 110    |
| CP002246.1              | <i>Yersinia enterocolitica</i> subsp. <i>paleartica</i> 105.5R(r)                        | [29]                   | 3935   |
| CP002247.1              | 105.5R (r)p plasmid                                                                      |                        | 86     |
| CP000720.1              | <i>Yersinia pseudotuberculosis</i> IP 31758                                              | [66]                   | 4124   |
| CP000719.1              | p153kb                                                                                   |                        | 136    |
| CP000718.1              | p59kb                                                                                    |                        | 64     |
| BX936398.1 <sup>a</sup> | <i>Yersinia pseudotuberculosis</i> IP 32953                                              | [67]                   | 3901   |
| BX936399.2              | pYV                                                                                      |                        | 95     |
| BX936400.1              | pYptb3                                                                                   |                        | 42     |
| CP001048.1              | <i>Yersinia pseudotuberculosis</i> PB1/+                                                 | No related publication | 4150   |
| CP001049.1              | pYP                                                                                      |                        | 87     |
| CP000950.1              | <i>Yersinia pseudotuberculosis</i> YPIII                                                 | [68]                   | 4192   |
| AM905950.1              | <i>Yersinia enterocolitica</i> plasmid pYE854                                            | [69]                   | 232    |
| AF102990.1              | <i>Yersinia enterocolitica</i> W22703 pYVe227                                            | No related publication | 69     |
| AY150843.2              | <i>Yersinia enterocolitica</i> A127/90 plasmid                                           | No related publication | 75     |
| AJ132618.1              | <i>Yersinia enterocolitica</i> cryptic plasmid                                           | [70]                   | 1      |
| FJ696405.1              | <i>Yersinia enterocolitica</i> 07-04449 plasmid                                          | [71]                   | 6      |
| FJ696406.1              | <i>Yersinia enterocolitica</i> 07-04449 plasmid                                          | [71]                   | 14     |
| AF336309.1              | <i>Yersinia enterocolitica</i> pYVe8081                                                  | [72]                   | 67     |
| In total                | 7 chromosomes, 14 plasmids                                                               |                        | 29 786 |

680 <sup>a</sup> Strains hybridized on microarray in this study, CDS = Coding sequence

681

682 Table S3 Numbers of gene groups that were present in all strains belonging to the given subgroup  
683 (Shared) and gene groups that were both shared and only present in strains of a given subgroup  
684 (Specific) based on hybridization results are shown in the table. Additionally, the number or  
685 specific gene groups with no known orthologs in the other species (*Y. enterocolitica* or *Y.*  
686 *pseudotuberculosis*) are given.

| Subgroup of strains                            | Number of gene groups |          |                                        |
|------------------------------------------------|-----------------------|----------|----------------------------------------|
|                                                | Shared                | Specific | With no orthologs in the other species |
| <i>Y. pseudotuberculosis</i> (n = 38)          | 4067                  | 2884     | 906                                    |
| <i>Y. enterocolitica</i> (n = 60)              | 3547                  | 1130     | 448                                    |
| <i>Y. enterocolitica</i> biotypes 2–4 (n = 51) | 4496                  | 207      | Not analysed                           |

687
